1 **“Estimating abundance and phenology from transect count data with GLMs”**

2 **Authors:**

3 Collin Edwards (corresponding author), Department of Biology, Tufts University, Medford MA  
4 02155 USA

5 Elizabeth E. Crone, Department of Biology, Tufts University, Medford MA 02155 USA

6

7 **Abstract**

8 Estimating population abundance is central to population ecology. With increasing concern over  
9 declining insect populations, estimating trends in abundance has become even more urgent. At  
10 the same time, there is an emerging interest in quantifying phenological patterns, in part  
11 because phenological shifts are one of the most conspicuous signs of climate change. Existing  
12 techniques to fit activity curves (and thus both abundance and phenology) to repeated transect  
13 counts of insects (a common form of data for these taxa) frequently fail for sparse data, and often  
14 require advanced knowledge of statistical computing. These limitations prevent us from  
15 understanding both population trends and phenological shifts, especially in the at-risk species for  
16 which this understanding is most vital. Here we present a method to fit repeated transect count  
17 data with Gaussian curves using linear models, and show how robust abundance and  
18 phenological metrics can be obtained using standard regression tools. We then apply this method  
19 to eight years of Baltimore checkerspot data using generalized linear models (GLMs). This case  
20 study illustrates the ability of our method to fit even years with only a few non-zero survey  
21 counts, and identifies a significant negative relationship between population size and annual  
22 variation in thermal environment (in growing degree days). We believe our new method provides  
23 a key tool to unlock previously-unusable sparse data sets, and may provide a useful middle  
24 ground between ad hoc metrics of abundance and phenology and custom-coded mechanistic  
25 models.

26 **Key words:** *population dynamics, phenology; climate change; peak abundance; activity period;*

27 *first emergence; Gaussian curve; Euphydryas phaeton, growing degree days, general linear*

28 *model*

29

30

## 31 **Introduction**

32 Ecologists are observing massively elevated extinction rates (Turvey and Crees 2019),  
33 driven in part by direct anthropogenic activities, climate change, and the spread of invasive  
34 species (Pievani 2014). We are also seeing frequent changes in the phenology of populations, a  
35 “globally coherent fingerprint of climate change” (Parmesan and Yohe 2003). Both of these  
36 patterns are particularly pronounced in insects, for which there are alarming signs of declining  
37 populations for many well-studied taxa (e.g. Thomas et al. 2005, Forister et al. 2010, Potts et al.  
38 2010) and more broadly (e.g. Hallman et al. 2017, van Klink et al. 2020). However, evidence for  
39 global trends is mixed, with other studies showing no overall trends and in some cases  
40 contradicting previous papers that found declines (Wagner et al. 2021). This conflicting literature  
41 highlights the limitations of current tools and data sets (Thomas et al. 2019, Didham et al. 2020).  
42 One key limitation is often the lack of data to estimate trends for individual species or  
43 populations as opposed to broad taxonomic groups or guilds (Wagner et al. 2021), which is  
44 especially problematic for rare or at-risk species.

45 One of the common forms of sampling for insect populations are systematic repeated  
46 surveys throughout an activity period, such as “Pollard” transect walks (Pollard 1977), bee bowls  
47 (e.g. Stemkovski et al. 2020), or trap nests (Forrest and Thomson 2011). Historically, the main  
48 goal of these surveys was simply to estimate yearly abundance (e.g. Zonneveld 1991, Pollard and  
49 Yates 1993, Schultz and Hammond 2003). More recently, there has been growing interest in also  
50 estimating phenology from this type of data, starting at least with Sparks and Yates (1997), but  
51 with considerable recent interest (e.g. Stewart et al. 2020, Fric et al. 2020). Estimating  
52 abundance and phenology from repeated count data seems like it should be easy, yet often  
53 remains a challenge. Initial approaches for estimating abundance involved averaging the counts  
54 of surveys across the activity period (Pollard et al. 1975, Pollard 1977, Thomas 1983, Pollard

55 and Yates 1993), which has clear limitations (e.g. requires appropriate estimation of activity  
56 period, appropriate sampling within activity period, and if the same population spreads its  
57 activity across a longer period, the average count will shrink). Initial approaches for estimating  
58 phenology often looked at the first day individuals were observed (e.g. Sparks and Yates 1997),  
59 but this metric can covary with population abundance and sampling effort, so can confound  
60 phenological shifts with other changes (Van Strien et al. 2008, Miller-Rushing et al. 2008,  
61 Inouye et al. 2019).

62 To improve on these basic approaches, numerous studies have proposed realistic or  
63 highly flexible models (for a list of examples, see Table 1). However, with few exceptions, these  
64 methods were developed or proposed in the context of repeated measures of flowering plants,  
65 where there are often dozens of time points in a year (e.g. Malo 2002, Clark and Thompson  
66 2011, Malo 2002, Clark and Thompson 2011, Proia et al. 2015, Austen et al. 2014). Perhaps as a  
67 consequence of being developed with such rich data, current methods generally require  
68 considerable data to work. This limitation holds both for the suite of models developed for  
69 flowering plants, the “Zonneveld model” – a mechanistic phenology curve commonly used to  
70 analyze insect counts (Zonneveld 1991, INCA 2002, Haddad et al. 2008) --, and more generic  
71 approaches like generalized additive models (GAMs) (Rothery and Roy 2001, Hodgson et al.  
72 2011, Newson et al. 2016, Stemkovski et al. 2020).

73 Ecologists sometimes address the limitations of current analytical techniques by working  
74 only with abundant species, or years for which there are many non-zero survey counts. For  
75 example, in a recent analysis of Ohio butterfly populations using GAMs, Wepprich et al. (2019)  
76 limited their analysis to cases where they had 10 or more surveys in a year. When fitting  
77 Spanish butterfly populations with Gaussian curves using a Bayesian model, Stewart et al.

78 (2020) use only species that were present in at least half of their surveys, with at least 35  
79 individuals observed per year. In their analysis of UK butterfly populations using GAMs,  
80 Hodgson et al. (2011) generally excluded sites where the species was observed in less than half  
81 the surveys. In simulations of data for the rare St. Francis' satyr butterfly, Haddad et al. (2008)  
82 found that when survey frequency dropped to three times per week, the Zonneveld model  
83 (implemented using INCA (2002)) failed more than 30% of the time.

84         While ecologists can gain a lot of information by fitting elegant models to rich data sets,  
85 having only tools that require rich data may prevent the analysis of rare species or years of low  
86 abundance, both of which are likely to lead to infrequent non-zero survey counts. Ignoring rare  
87 species in turn can bias our understanding of global trends (Didham et al. 2020), and ignoring  
88 years of low abundance limits our ability to infer population dynamics or carry out population  
89 viability analysis (e.g. Gerber and Demaster 1999, Morris et al. 2002). To make matters worse,  
90 even with considerable data, there is no guarantee that existing methods can be solved  
91 numerically. For example, the Zonneveld model, which has become something of a standard for  
92 Pollard-walk style time series, can run into issues of confounded parameters; it is difficult to tell  
93 if you have a few long-lived butterflies or many short-lived ones, leading the Zonneveld model  
94 to fail (Gross et al. 2007, Table S1). Similarly, Malo (2002) presented an elegant phenological  
95 model based on the exponential sine function, but found that their numerical solvers failed to  
96 find reasonable solutions. They thus had to modify the 5-parameter model to include two  
97 additional parameters per year – defining the beginning and ending of the activity peaks for each  
98 year – which have to be determined ad-hoc by users for each year of data. In some other cases,  
99 Bayesian methods are recommended when data are sparse compared to model complexity.  
100 However, custom-coded Bayesian analyses can fail in ways that are not obvious to non-experts

101 (Lele and Dennis 2009, Seaman et al. 2012).

102 A final challenge with current analytical methods is that many require substantial  
103 knowledge of computational statistics to implement successfully. There are certainly statistical  
104 ecologists with the skill and experience to write custom-coded hierarchical Bayesian models and  
105 ensure that the resulting estimates are sensible (e.g. Lindén and Mäntyniemi 2011, Chapman et  
106 al. 2015), but they are the minority of ecologists. Of the statistical methods we encountered in  
107 writing this paper, only two (the Zonneveld model and GAMs) have seen much use. Not  
108 coincidentally, these are the two methods with easy-to-use program implementations (INCA  
109 (INCA 2002) and the **mgcv** package in R (Wood 2017), respectively). In contrast, another seven  
110 methods published in the last 20 years have only been used in subsequent publications a  
111 combined total of six times<sup>1</sup> (Table 1), and only one of those was applied to insect data (Belitz et  
112 al. (2020), itself proposing a new method). To date, the majority of the apparent surplus of  
113 analytical tools for repeated count data are not actually being used to study insect abundance or  
114 phenology.

115 Taken together, it is clear that ecologists lack an accessible, robust statistical tool for  
116 quantifying population abundance and phenology for species, years, or sites with sparse data. In  
117 this paper, we propose an approach to fit such data with Gaussian curves using generalized linear  
118 models (GLMs). To illustrate this method, we first outline the algebra behind the procedure, then  
119 demonstrate its application to a 9-year time series of monitoring from a population of Baltimore  
120 checkerspot butterflies (*Euphydryas phaeton*) in Massachusetts. In the supplements we offer a  
121 detailed explanation of how to implement this approach in the programming language R (R Core  
122 Team 2020), and provide simple code to act as a template. The simplicity of Gaussian curves

---

<sup>1</sup> In ecology. The Gaussian mixture model (Proia et al. 2016) has been used several times in publications on highway maintenance and once on diagnostics of ventricular septal defects.

123 (defined by only 3 parameters) means that our proposed method can be applied to almost all data  
124 – we find that even three non-zero days of count is sufficient to fit an activity curve (admittedly  
125 one with wide confidence intervals). The familiarity of linear regression and Gaussian curves  
126 (and our example code) make this approach accessible to any ecologist who can run a linear  
127 regression in R.

128

129

### 130 **Gaussian curve as a linear model**

131 The basis of our method is that a Gaussian curve has the form

$$f(x) = ae^{-\frac{(x-\mu)^2}{2\sigma^2}} \quad 1$$

132 When  $a$  is chosen to make Equation 1 integrate to 1, this is the normal or Gaussian distribution.

133 Since everything in Equation 1 is a constant except for  $x$ , if we multiply it out and define  $\beta_0$ ,  $\beta_1$ ,

134  $\beta_2$  appropriately in terms of the other constants (see Appendix S1 for the algebra), we can rewrite

135 the Gaussian curve as

$$f(x) = e^{\beta_0 + \beta_1 x + \beta_2 x^2} \quad 2$$

136 Here we can see that the terms in the exponent are a quadratic equation. This means that if we

137 take the natural log of both sides, we are left with a familiar linear model with both a linear and a

138 quadratic term:

$$\ln(y) = \beta_0 + \beta_1 x + \beta_2 x^2 \quad 3$$

139 (Note that to produce an appropriate Gaussian curve,  $\beta_1$  must be positive and  $\beta_2$  must be

140 negative; otherwise this equation produces a monotonic or convex curve). Despite our special

141 use for it, Equation 3 is an ordinary linear model of a quadratic equation, and can be fit with

142 standard tools for linear models. In the context of phenology, the most straightforward analysis

143 would use empirical estimates of abundance or activity (e.g. transect counts of butterflies or  
144 flowers) for dependent variable  $y$ , which is distributed following a Gaussian curve in relation to  
145 some measure of time (e.g. day of year) for the independent variable  $x$  (Fig. 1A-I).

146 Fitting a linear model of  $\ln(y)$  vs.  $x$  provides estimates and confidence intervals for  $\beta_0$ ,  $\beta_1$ ,  
147 and  $\beta_2$ . By reversing the algebra between Equations 1 and 2, we can recover the parameters of  
148 the Gaussian curve (mean  $\mu$ , variance  $\sigma^2$ ), as well as metrics determined by the gaussian curve  
149 (e.g. area under the curve) that may be useful in interpreting the fitted activity curves (Appendix  
150 S1: Fig. S1). First,  $\mu$ , the estimated **day of peak activity** and **mean day of activity** (these are the  
151 same since the Gaussian curve is symmetrical) can be calculated from the slopes of the linear and  
152 quadratic terms:

$$\mu = -\frac{\beta_1}{2\beta_2} \quad 4$$

153 The standard deviation of the Gaussian curve,  $\sigma$ , is a function of the slope of the quadratic term:

$$\sigma = \sqrt{-\frac{1}{2\beta_2}} \quad 5$$

154 In the case study below, we refer to  $2*1.285*\sigma$  as the **activity period**. This corresponds to the  
155 range of dates between the 0.1 and the 0.9 quantiles, and so this measures the duration of time  
156 when the middle 80% of observations are estimated to occur (e.g. Jonzén et al. 2006, Michielini  
157 et al. 2020).

158 The area under the gaussian curve,  $N$ , is a **population abundance index**:

$$N = \left( \sqrt{-\frac{2\pi}{2\beta_2}} \right) \exp\left( \beta_0 - \frac{\beta_1^2}{4\beta_2} \right) \quad 6$$

159 We use the term “abundance index” because, for constant sampling effort, survival, and  
160 detection probability,  $N$  will be proportional to the number of active individuals (e.g. Gross et al.



161 2007). However, it is actually a measure of estimated observed activity-days (Dennis et al. 2015,  
162 Wepprich et al. 2019).

163 We note that here we have focused on a few phenological metrics, including the days of  
164 0.1, 0.5 (e.g. day of peak) and 0.9 quantile. However, because our proposed approach fits a  
165 Gaussian curve, from estimated  $\mu$  and  $\sigma$  it is trivial to calculate any characteristics of a Gaussian  
166 curve, including (a) any arbitrary quantiles (e.g. the 0.05 and 0.95 quantiles used in Stemkovski  
167 et al. 2020), (b) the height of the curve (e.g. maximum number of flowers, Miller-Rushing and  
168 Inouye (2009)), or (c) the “observable flight season” (days when the curve exceeds 1, a metric  
169 reflecting the period of likely human detection that parallels first and last observation dates)  
170 (Bonoan et al., *in review*).

171 Standard errors of derived parameters such as  $\mu$ ,  $\sigma^2$ , or  $N$  can be estimated using the delta  
172 method (Williams et al. 2002), or by parametric bootstrapping (Dennis 1996). Code for these  
173 analyses is given in Appendices S2 (tutorial as html), S3 (analysis as html) and S4 (data and  
174 Rmarkdown sources for Appendices S2 and S3). All code was written and run in R version 4.0.0  
175 (R Core Team, 2020).

176

## 177 **Case study**

### 178 *Data set*

179 From 2012-2020, we conducted a capture-recapture study of Baltimore checkerspot  
180 (*Euphydryas phaeton*) butterflies at a natural area (Williams Conservation Land) in the town of  
181 Harvard MA, USA (Brown and Crone 2016, Brown et al. 2017, Crone 2018). Baltimore  
182 checkerspot is a univoltine species, with one clear flight period of adults per year. Surveys were  
183 conducted by visiting the site 2-3 times a week from mid-June until the population was clearly

184 finished for the year; the onset of checkerspot flight at this site is usually in late June or early  
185 July. To illustrate the use of a Gaussian curve to estimate phenological metrics, we converted  
186 capture-recapture data to counts of individual animals handled on each visit to the site. This  
187 monitoring protocol creates a data structure that is similar to traditional “Pollard walk” style  
188 monitoring (Pollard 1977, Pollard and Yates 1993, Wepprich et al. 2019) but differs from Pollard  
189 walks in that the site was searched freely, rather than by walking a fixed route. For comparison  
190 with the Gaussian analyses below, we estimated population size each year using standard open  
191 population capture-recapture models (see supplemental methods). For comparison to existing  
192 methods, we fit our data to the Zonneveld model using INCA (INCA 2002). We chose to  
193 compare with the Zonneveld model because it is also easy to use, and as a 4-parameter model, it  
194 is one of the simplest (and thus most likely to fit our sparse data).

195

196 *Methods:*

197 *Estimation of phenology metrics:* We fit Gaussian curves to these data using generalized  
198 linear models (GLM) with a negative binomial family and log link function, with the number of  
199 butterflies seen on each day as the dependent variable, day of year and day of year squared as  
200 independent variables; we used a single model with interaction terms to allow curves to fit each  
201 year separately, but with shared estimation of the model variance term. After fitting the linear  
202 model, we used equations 4-7 to calculate the estimated mean day of activity, standard deviation  
203 of flight period, population abundance, and peak abundance for each year, and use mean day of  
204 activity and standard deviation of activity to calculate onset (day of 0.1 quantile) and end (day of  
205 0.9 quantile) of activity. For heuristic purposes, we calculated confidence intervals for these  
206 metrics using both the delta method and parametric bootstrapping. To test for asymmetry in

207 activity curves (a feature common in some systems and models), we regressed residuals by day  
208 of year using a linear model and then again with a cubic regression spline (using the **mgcv**  
209 package) (Wood 2017).

210 *Comparison to INCA fits:* We used the INCA program to fit each year of our data (INCA  
211 2002). We carried out this analysis with INCA twice: first we fit INCA using default settings,  
212 putting INCA on a level playing field with the Gaussian method; second, we fit INCA again,  
213 providing an informative prior on mortality rate, defined by the mean and standard error of daily  
214 mortality for the Baltimore Checkerspot (Brown and Crone 2016, their Table 1). Both INCA and  
215 the Gaussian curve produce indices of population abundance rather than complete population  
216 estimates, and these indices are on different scales. As such, we focus on the correlation between  
217 INCA and Gaussian metrics.

218 *Evaluating an environmental driver:* After estimating abundance and phenology, a  
219 common next question is to ask whether changes in these population characteristics are  
220 associated with changes in environmental conditions (see, e.g., Roy and Sparks 2000, Forister  
221 and Shapiro 2003, Marra et al. 2005, Jonzén et al. 2006, Miller-Rushing et al. 2008, van Buskirk  
222 et al. 2009, Hodgson et al. 2011, Gordo et al. 2013, Bertin 2015, Cayton et al. 2015, Barton and  
223 Sandercock 2018, Heberling et al. 2019, Oke et al. 2019, Park et al. 2019, Fric et al. 2020,  
224 Horton et al. 2020, Stewart et al. 2020, Stemkovski et al. 2020). It is possible in principle to  
225 simultaneously fit drivers of population or phenological change and parameters themselves (e.g.  
226 Mizel et al. 2019). However, the algebra of converting a Gaussian curve to a linear model does  
227 not enable easy inclusion of covariates of the ecologically meaningful derived metrics such as  
228 onset of activity or peak dates (XXX, unpubl. calculations). One accessible alternative to  
229 custom-coding complex models is a two-step process of first estimating derived parameters (e.g.

230 population abundance index) with linear models, then using these derived parameters in  
231 subsequent models (e.g. the approach used in Wepprich et al. (2019), but using GLMs instead of  
232 GAMs for the first step). To account for uncertainty in derived parameters, it is straightforward  
233 to use parameteric bootstrapping.

234 To illustrate this approach, we compared yearly estimates of the day of mean activity,  
235 flight period, and population abundance to temperature. Determining the most appropriate  
236 metrics to capture environmental drivers of population dynamics or phenology is an open  
237 question in ecology, and beyond the scope of this study. We instead chose to demonstrate the  
238 principles with growing degree days (GDD), a common measure of thermal environment that has  
239 been found to predict plant and insect phenology (e.g. Hodgson et al. 2011, Cayton et al. 2015).  
240 We used a developmental threshold of 10 degrees as in Cayton et al. (2015), and calculated GDD  
241 over the period from January 1 through July 1 of each year to represent the time before most  
242 butterflies eclosed (for details, see Appendix S1). For each population metric (abundance, mean  
243 day of activity, flight period), we fit a simple linear regression with GDD as the predictor. We  
244 also calculated 95% confidence intervals for the slope using parametric bootstrapping, and the  
245 proportion of p values that were less than 0.05 among these bootstrapped model fits.

246

247 *Results:*

248 *Estimation of phenology metrics:* For this univoltine butterfly population, the Gaussian  
249 curve provides a visually satisfying fit, with the model reasonably fitting years with many  
250 surveys (Fig. 1 A-F) and those with few (2018-2020, Fig. 1G-I). We found no overall indication  
251 of asymmetry in activity when fitting our residuals with a linear model (slope = 0.085,  $p=0.57$ ),  
252 and our fitted cubic spline showed no notable deviations from a linear model (estimated degrees

253 of freedom for the smoothing term was 1, suggesting a straight line is the best fit). Estimates of  
254 our three metrics (Abundance index, flight period, and day of peak activity) were generally very  
255 precise, with notable exceptions for 2019 and 2020, years with only a few non-zero survey  
256 counts (Figs. 2A-C). We also see a strong correspondence between our abundance index and  
257 population estimates from the capture-recapture study ( $R^2 = 0.94$ ) (Fig. 3A). These data also  
258 demonstrate the bias of first and last dates of observations in relation to population size (Fig. 3C-  
259 D); compared to 0.1 and 0.9 quantiles estimated from annual Gaussian curves, years with smaller  
260 populations had later first observations and earlier last observations.

261 *Comparison to INCA fits:* Without independent estimates of mortality, INCA fit only 3  
262 of the 9 years of data (Table S1). Using published mortality estimates (Brown and Crone 2016)  
263 as an informative prior probability distribution, INCA was able to fit more years of data (7 of the  
264 9), but still failed to fit 2019 and 2020. For the years in which the informed INCA model fit,  
265 there was a very strong correspondence between the informed INCA fit and the Gaussian fit,  
266 with an R-squared of 0.996 (population abundance indices) and 0.883 (day of peak activity) (Fig.  
267 3B).

268 *Evaluating an environmental driver:* Temperature had a strong association with  
269 population abundance index, with warmer years associated with smaller population indices  
270 (estimate slope: -2.12; bootstrapped 95% CI of slope of  $N$  vs GDD: [-2.3087, -2.0598]; across  
271 our bootstraps, this was almost always significant ( $p < 0.05$  in 99.6% of bootstraps) (Fig. 3D)).  
272 Mean day of activity was consistently earlier in warmer years (estimated slope: -0.004;  
273 bootstrapped 95% CI of slope of  $\mu$  vs. GDD: [-0.0065, -0.0024]), but it was rarely statistically  
274 significant ( $p < 0.05$  only 6 out of 10,000 times) (Fig. 3E). Temperature was not associated with  
275 differences in flight period (estimated slope: -0.002; bootstrapped 95% CI of  $\sigma$  vs. GDD: [-

276 0.0023, 0.0007],  $p < 0.05$  0 of 10,000 times) (Fig 3F).

277

## 278 **Discussion**

279 In this paper, we show how a Gaussian curve can be fit to insect count data using familiar  
280 methods for linear models, and that it allows us to estimate abundance and phenology even for  
281 years of sparse data where other methods can fail. We hope this approach provides a much-  
282 needed tool for ecologists trying to study insect decline or the phenology and dynamics for at-  
283 risk species (or species that have sparse count data for other reasons). There is a particular need  
284 for tools like this given the growing interest in documenting and understanding insect decline;  
285 our ability to do so is in large part limited by available data and methods (Didham et al. 2020).  
286 We are not the first to use Gaussian curves to fit count data (e.g. Lindén and Mäntyniemi 2011,  
287 Dennis et al. 2015, Oke et al. 2019, Stewart et al. 2020), but past implementations have required  
288 custom coding and more advanced knowledge of statistical computing.

289 The combination of a simple mathematical form (3 parameters) and the robust fitting  
290 algorithms associated with linear models allows Gaussian models to estimate phenology and  
291 abundance even in years with relatively few observations (see, e.g., Fig 1H). Recent studies of  
292 butterfly (Hodgson et al. 2011, Wepprich et al. 2019, Stewart et al. 2020) and bee (Stemkovski et  
293 al. 2020) populations have generally been restricted to relatively abundant species by the needs  
294 of their more data-hungry methods. These more flexible analytical tools like GAMs provide  
295 more detailed information about activity curves, but at the cost of requiring sufficient data to  
296 differentiate between the many possible shapes those more flexible curves can take. In contrast,  
297 while the Gaussian curve is constrained in shape and cannot capture complex activity curves, we  
298 are consistently able to fit curves with only 3 non-zero surveys (XXX unpubl. simulations). Our

299 goal is not to replace existing tools, which often provide more detailed information than a  
300 Gaussian curve can, like capturing multimodality (e.g. GAMs) or measuring asymmetry and  
301 linking it to biological processes (e.g. the Zonneveld model). Rather, we want to “unlock” data  
302 sets which were previously unusable either because the observations were too sparse for other  
303 methods, or interested parties did not have the computational statistics background needed to fit  
304 more complex models. We explain and demonstrate this method assuming a simple data  
305 structure (e.g. multiple years, but one species and one site). With hierarchical data (e.g. multiple  
306 sites, multiple species), this method can be expanded upon to fit separate curves for statistical  
307 unit (e.g. each year of each site) (Bonoan et al., *in review*).

308         Comparing fits and estimates of the Baltimore checkerspot butterfly using our Gaussian  
309 method, the INCA implementation of the Zonneveld model, and capture-recapture tools  
310 demonstrate the value of our approach. Without outside information, the INCA model fit only  
311 one third of our 9 years of data, and even with the inclusion of an independent estimate of  
312 mortality rates, INCA failed to fit the two years with the lowest estimated abundance (Table S1).  
313 However, for years when we could fit the data using the Zonneveld/INCA model informed by  
314 independent estimates of mortality, we see a very strong correspondence between INCA and  
315 Gaussian estimates of population abundance indices ( $R^2 = 0.99$ ) (Fig. 3B), suggesting that our  
316 proposed method is a useful and comparable alternative to INCA when data are sparse. We also  
317 see a tight correlation between the abundance index of the Gaussian model, and capture-  
318 recapture estimates of population size calculated separately from the same data (Fig. 3A), which  
319 suggests that abundance estimates are unbiased. This correlation compares favorably with other  
320 methods of fitting transect data; Haddad et al. (2008) found no correlation between mark-  
321 recapture estimates of population size and population size estimated using the Zonneveld model.

322 However, the fact that we find a 1:1 match of  $N$  (an index that reflects longevity as well as  
323 abundance) and capture-recapture estimates is likely coincidental. By chance, our capture  
324 probability during surveys was  $\approx 0.15$  (XXX and YYY unpubl.), and the apparent survival of  
325 Baltimore checkerspot butterflies at our site is 0.844/day (Brown and Crone 2016); these values  
326 mean that in our example, the capture probability - by chance - exactly cancelled out the fact that  
327  $N$  is actually in units of “butterfly days”.

328         While it is becoming increasingly rare, objectively problematic metrics for phenological  
329 patterns such as first or last observations are still used by at least some ecologists (e.g. Fric et al.  
330 2020, Colom et al. 2020). For many types of data sets, observations of first and last events are  
331 known to be biased, as the day of first or last observation depends in part on population size and  
332 detectability (Van Strien et al. 2008, Miller-Rushing et al. 2008, Inouye et al. 2019). Of course,  
333 sometimes data limitations constrain analysis to only use first or last metrics, especially when  
334 comparing with historic data sets (e.g. Heberling et al. 2019). However, in many cases ecologists  
335 have much more complete data, and should not be limited to using problematic phenological  
336 metrics. This point has been made thoroughly in other studies; as expected, for the Baltimore  
337 Checkerspot we see consistent biases in first and last date observed based on population size  
338 (Fig. 3C-D). As an alternative to problematic metrics, fitting Gaussian curves may be a  
339 reasonable first step for many ecologists interested in describing phenology. Early and late  
340 quantiles (e.g. 0.1 and 0.9, as in Jonzén et al. (2006) and Michielini et al. (2020), or 0.05 and  
341 0.95 as in Stemkovski et al. 2020) can easily be calculated from estimated  $\mu$  and  $\sigma$ , and are  
342 unbiased analogs to represent the early and late parts of the activity season (cf. Bonoan et al., *in*  
343 *review*).

344         We demonstrated how our approach can be used to link population-level patterns with



345 environmental (or other) drivers. In doing so, we found a significant negative relationship  
346 between growing degree day (GDD) and abundance indices, and a non-significant pattern of  
347 earlier activity in warmer years that was consistent across bootstraps. These results are largely  
348 consistent with the patterns found in other studies. Warmer temperatures have led to earlier  
349 activity for butterfly species in the UK (MacGregor et al. 2019), Spain (Stefanescu et al. 2003,  
350 Stewart et al. 2020), and Ohio (Cayton et al. 2015), and studies have found that in recent decades  
351 butterflies have advanced their phenology in the UK (MacGregor et al. 2019) and across the  
352 northern hemisphere (Parmesan 2007). The relationship between temperature and abundance  
353 across studies is more complicated. Studies have found warmer temperatures leading to higher  
354 population abundance in most butterfly species in the UK (Roy et al. 2001) and a mixture of  
355 butterfly abundance responses to temperature in Spain (Stewart et al. 2020). In contrast, Isaac et  
356 al. (2011) found butterfly density in England was generally lower in regions with higher  
357 temperatures, and Colom et al. (2020) found warmer summers were associated with smaller  
358 butterfly populations on the Spanish island of Menorca. In Massachusetts USA, butterfly  
359 populations near their species' northern range limits are generally increasing, and populations  
360 near their species southern range limits are generally decreasing (Breed et al. 2012, Michielini et  
361 al. 2020).

362 Gaussian curves are only well-suited to represent data that is unimodal and approximately  
363 symmetric. For many phenological events, the assumption of symmetry may be a reasonable  
364 approximation (see Fig 1, and Stewart et al. 2020), although this is of course a hypothesis that  
365 could be explored depending on the goals of an analysis (in our analysis of Baltimore  
366 checkerspot, residuals did not indicate skew). Multimodal distributions may be more  
367 problematic. For multivoltine insects, Generalized Additive Models (GAMs) (e.g. Knudsen et al.

368 2007, Moussus et al. 2009, Hodgson et al. 2011, Newson et al. 2016, Stemkovski et al. 2020)  
369 have been used to capture changes in phenology over time. Although they are not described by a  
370 parametric equation, features like the onset (0.1 quantile) or end (0.9 quantile) can be extracted  
371 from GAMs numerically (cf. Stemkovski et al. 2020). Another approach to evaluating  
372 phenological events without assuming a particular distribution is quantile regression (Cade and  
373 Noon 2003, Koenker 2019), which has been used in several studies of bird migration (e.g. Gordo  
374 et al. 2013, Barton and Sandercock 2018), and occasionally for Lepidoptera (Gimesi et al. 2012,  
375 Michielini et al. 2020). Like GAMs and GLMs, quantile regression shares the property of  
376 drawing on well-established and well-validated statistical approaches, rather than developing  
377 new ones.

378         Understanding trends in abundance has long been a goal of both population ecology and  
379 conservation management, and this has become all the more urgent with observed and suspected  
380 population declines in a wide range of species, particularly insects. Similarly, because  
381 phenological shifts are one of the most conspicuous signs of climate change, there is growing  
382 interest in their causes and consequences. We expect that the widespread interest in abundance  
383 and phenology will continue to lead to a growing number of new methods for interpreting  
384 patterns in count data. At the same time, not every new method is guaranteed to work for all (or  
385 even most) data, and custom-coding for every question can be error-prone, time consuming, and  
386 intimidating to many ecologists. We encourage ecologists to be aware of well-established  
387 existing methods, and provide the linearized Gaussian model as a simple tool for unlocking  
388 previously-inaccessible sparse data sets.

389

390 **Declarations:** This work was conducted with support from NSF DEB 19-20834 and the DOD

391 SERDP program (RC-2700). We thank many XXXX lab members who participated in Baltimore  
392 checkerspot data collection, especially YYY YYYY and ZZZZ ZZZZZZZZZ, and Brian Inouye,  
393 Jessica Forrest, and two anonymous reviewers for helpful suggestions on the manuscript. Data  
394 and code will be available on Dryad.  
395

396 **References:**

- 397 Austen, Emily J., Donald A. Jackson, and Arthur E. Weis. 2014. “Describing flowering schedule  
398 shape through multivariate ordination.” *International Journal of Plant Sciences* 175(1): 70–  
399 79.
- 400 Barton, G. G., and B. K. Sandercock. 2018. “Long-term changes in the seasonal timing of  
401 landbird migration on the pacific flyway.” *The Condor: Ornithological Applications* 120(1):  
402 30-46.
- 403 Belitz, Michael W., Elise A. Larsen, Leslie Ries, and Robert P. Guralnick. 2020. “The accuracy  
404 of phenology estimators for use with sparsely sampled presence-only observations. *Methods*  
405 *in Ecology and Evolution* 11(10): 1273-1285.
- 406 Bertin, Robert I. 2015. “Climate change and flowering phenology in Worcester County,  
407 Massachusetts.” *International Journal of Plant Sciences* 176 (2): 107–19.
- 408 Breed, Greg A., Sharon Stichter, and Elizabeth E. Crone. 2012. “Climate-driven changes in  
409 Northeastern US butterfly communities.” *Nature Climate Change* 3(2): 142–45.
- 410 Brown, Leone M., and Elizabeth E. Crone. 2016. “Minimum area requirements for an at-risk  
411 butterfly based on movement and demography: movement, demography, and minimum  
412 area.” *Conservation Biology* 30(1): 103–112.
- 413 Brown, Leone M., Rebecca K. Fuda, Nicolas Schtickzelle, Haley Coffman, Audrey Jost, Alice  
414 Kazberouk, Eliot Kemper, Emma Sass, and Elizabeth E. Crone. 2017. “Using animal  
415 movement behavior to categorize land cover and predict consequences for connectivity and  
416 patch residence times.” *Landscape Ecology* 32 (8): 1657–70.
- 417 Cade, Brian S., and Barry R. Noon. 2003. “A gentle introduction to quantile regression for  
418 ecologists.” *Frontiers in Ecology and the Environment* 1(8): 412–420.

- 419 Cayton, Heather L., Nick M. Haddad, Kevin Gross, Sarah E. Diamond, and Leslie Ries. 2015.  
420 “Do growing degree days predict phenology across butterfly species?” *Ecology* 96(6): 1473-  
421 1479.
- 422 Chapman, Daniel S., Sandra Bell, Stephan Helfer, and David B. Roy. 2015. “Unbiased inference  
423 of plant flowering phenology from biological recording data.” *Biological Journal of the*  
424 *Linnean Society* 115(3):543–554.
- 425 Clark, Robert M., and Roy Thompson. 2011. “Estimation and comparison of flowering curves.”  
426 *Plant Ecology & Diversity* 4 (2-3): 189–200.
- 427 Colom, Pau, Anna Traveset, David Carreras, and Constantí Stefanescu. 2020. “Spatio-temporal  
428 responses of butterflies to global warming on a Mediterranean island over two decades.”  
429 *Ecological Entomology*.
- 430 Crone, E. 2018. “The rise and fall of a checkerspot population.” *News Lepid. Soc* 60:40–41.
- 431 Dennis, Brian. 1996. “Discussion: should ecologists become Bayesians?” *Ecological*  
432 *Applications* 6(4):1095–1103.
- 433 Dennis, Emily B., Byron J. T. Morgan, Stephen N. Freeman, David B. Roy, and Tom Brereton.  
434 2015. “Dynamic models for longitudinal butterfly data.” *Journal of Agricultural, Biological,*  
435 *and Environmental Statistics* 21(1): 1–21.
- 436 Didham, Raphael K., Yves Basset, C. Matilda Collins, Simon R. Leather, Nick A. Littlewood,  
437 Myles H. M. Menz, Jörg Müller, et al. 2020. “Interpreting insect declines: seven challenges  
438 and a way forward.” *Insect Conservation and Diversity* 13(2): 103–14.
- 439 Elmendorf, Sarah C., Theresa M. Crimmins, Katharine L. Gerst, and Jake F. Weltzin. 2019.  
440 “Time to branch out? application of hierarchical survival models in plant phenology.”  
441 *Agricultural and Forest Meteorology* 279: 107694.

- 442 Forister, Matthew L., Andrew C. McCall, Nathan J. Sanders, James A. Fordyce, James H.  
443 Thorne, Joshua O'Brien, David P. Waetjen, and Arthur M. Shapiro. 2010. "Compounded  
444 effects of climate change and habitat alteration shift patterns of butterfly diversity."  
445 *Proceedings of the National Academy of Sciences* 107(5): 2088–2092
- 446 Forister, Mathew, and Arthur Shapiro. 2003. "Climatic trends and advancing spring flight of  
447 butterflies in lowland California." *Global Change Biology* 9(7): 1130-1135.  
448 107 (5): 2088–92. <https://www.pnas.org/content/107/5/2088.short>.
- 449 Forrest, Jessica, and James D. Thomson. 2010. "Consequences of variation in flowering time  
450 within and among individuals of *Mertensia fusiformis* (Boraginaceae), an early spring  
451 wildflower." *American Journal of Botany* 97(1): 38–48.
- 452 Fric, Faltýnek, Michal Rindoš, and Martin Konvička. 2020. "Phenology responses of temperate  
453 butterflies to latitude depend on ecological traits." *Ecology Letters* 23 (1): 172–80.
- 454 Gerber, Leah R., and Douglas P. Demaster. 1999. "A quantitative approach to endangered  
455 species act classification of long-lived vertebrates: application to the North Pacific humpback  
456 whale." *Conservation Biology* 13(5): 1203–14.
- 457 Gimesi, László, Réka Homoródi, Anikó Hirka, Károly Szenteleki, and Levente Hufnagel. 2012.  
458 "The effect of climate change on light trap capturing data of Lepidoptera." *International*  
459 *Proceedings of Chemical, Biological and Environmental Engineering* 28: 255–259.
- 460 Gordo, Oscar, Piotr Tryjanowski, Jakub Z. Kosicki, and Miroslav Fulín. 2013. "Complex  
461 phenological changes and their consequences in the breeding success of a migratory bird, the  
462 white stork *Ciconia ciconia*." *The Journal of Animal Ecology* 82(5): 1072–1086.
- 463 Gross, Kevin, Eric J. Kalendra, Brian R. Hudgens, and Nick M. Haddad. 2007. "Robustness and  
464 uncertainty in estimates of butterfly abundance from transect counts." *Population Ecology*

465 49(3): 191–200.

466 Haddad, Nick M., Brian Hudgens, Chris Damiani, Kevin Gross, Daniel Kuefler, and Ken  
467 Pollock. 2008. “Determining optimal population monitoring for rare butterflies: monitoring  
468 rare butterflies.” *Conservation Biology* 22(4): 929–40.

469 Hallmann, Caspar A., Martin Sorg, Eelke Jongejans, Henk Siepel, Nick Hofland, Heinz Schwan,  
470 Werner Stenmans, et al. 2017. “More than 75 percent decline over 27 years in total flying  
471 insect biomass in protected areas.” *PloS One* 12 (10): e0185809.

472 Heberling, J. Mason, Caitlin McDonough MacKenzie, Jason D. Fridley, Susan Kalisz, and  
473 Richard B. Primack. 2019. “Phenological mismatch with trees reduces wildflower carbon  
474 budgets.” *Ecology Letters* 22(4): 616–623.

475 Herrerías-Diego, Yvonne, Mauricio Quesada, Kathryn E. Stoner, and Jorge A. Lobo. 2006.  
476 “Effects of forest fragmentation on phenological patterns and reproductive success of the  
477 tropical dry forest tree *Ceiba aesculifolia*: forest fragmentation and reproductive success.”  
478 *Conservation Biology* 20(4): 1111–20

479 Hodgson, J. A., C. D. Thomas, T. H. Oliver, B. J. Anderson, T. M. Brereton, and E. E. Crone.  
480 2011. “Predicting insect phenology across space and time.” *Global Change Biology* 17(3):  
481 1289–1300.

482 Horton, Kyle G., Frank A. La Sorte, Daniel Sheldon, Tsung-Yu Lin, Kevin Winner, Garrett  
483 Bernstein, Subhansu Maji, Wesley M. Hochachka, and Andrew Farnsworth. 2020.  
484 “Phenology of nocturnal avian migration has shifted at the continental scale.” *Nature Climate  
485 Change* 10(1): 63–68.

486 INCA: Insect Count Analyzer. 2002. A user-friendly program to analyze transect count data. The  
487 Urban Wildlands Group, <http://www.urbanwildlands.org/INCA/>.

- 488 Inouye, Brian D., Johan Ehrlén, and Nora Underwood. 2019. “Phenology as a process rather than  
489 an event: from individual reaction norms to community metrics.” *Ecological Monographs*  
490 89(2): e01352.
- 491 Isaac, Nick J. B., Marco Girardello, Tom M. Brereton, and David B. Roy. 2011. “Butterfly  
492 abundance in a warming climate: patterns in space and time are not congruent.” *Journal of*  
493 *Insect Conservation* 15(1-2): 233–40.
- 494 Jonzén, Niclas, Andreas Lindén, Torbjørn Ergon, Endre Knudsen, Jon Olav Vik, Diego Rubolini,  
495 Dario Piacentini, et al. 2006. “Rapid advance of spring arrival dates in long-distance  
496 migratory birds.” *Science* 312(5782): 1959–1961.
- 497 Knudsen, E., A. Lindén, T. Ergon, N. Jonzén, J. O. Vik, J. Knape, J. E. Røer, and N. C. Stenseth.  
498 2007. “Characterizing bird migration phenology using data from standardized monitoring at  
499 bird observatories.” *Climate Research* 35: 59–77.
- 500 Koenker, Roger. 2019. “Quantreg: Quantile Regression.” [https://CRAN.R-](https://CRAN.R-project.org/package=quantreg)  
501 [project.org/package=quantreg](https://CRAN.R-project.org/package=quantreg).
- 502 Lele, Subhash R., and Brian Dennis. 2009. “Bayesian methods for hierarchical models: are  
503 ecologists making a Faustian bargain?” *Ecological Applications* 19(3): 581–584
- 504 Lindén, Andreas, and Samu Mäntyniemi. 2011. “Using the negative binomial distribution to  
505 model overdispersion in ecological count data.” *Ecology* 92(7): 1414–21.
- 506 Macgregor, Callum J., Chris D. Thomas, David B. Roy, Mark A. Beaumont, James R. Bell, Tom  
507 Brereton, Jon R. Bridle, et al. 2019. “Climate-induced phenology shifts linked to range  
508 expansions in species with multiple reproductive cycles per year.” *Nature Communications*  
509 10(1): 1—10.



- 510 Malo, J. E. 2002. “Modelling unimodal flowering phenology with exponential sine equations.”  
511 *Functional Ecology* 16(3): 413–18.
- 512 Marra, Peter P., Charles M. Francis, Robert S. Mulvihill, and Frank R. Moore. 2005. “The  
513 influence of climate on the timing and rate of spring bird migration.” *Oecologia* 142(2): 307–  
514 315.
- 515 Michielini, James P., Erik B. Dopman, and Elizabeth E. Crone. 2020. “Changes in flight period  
516 predict trends in abundance of Massachusetts butterflies.” *Ecology Letters*.
- 517 Miller-Rushing, Abraham J., David W. Inouye, and Richard B. Primack. 2008. “How well do  
518 first flowering dates measure plant responses to climate change? The effects of population  
519 size and sampling frequency.” *Journal of Ecology* 96(6): 1289-1296.
- 520 Miller-Rushing, Abraham J., and David W. Inouye. 2009. “Variation in the impact of climate  
521 change on flowering phenology and abundance: an examination of two pairs of closely  
522 related wildflower species.” *American Journal of Botany* 96(10): 1821–29.
- 523 Mizel, Jeremy D., Joshua H. Schmidt, Laura M. Phillips, and Carol L. McIntyre. 2019. “A  
524 binomial N $\square$  mixture model for estimating arrival and departure timing.” *Methods in Ecology*  
525 *and Evolution* 10(7): 1062–71.
- 526 Morris, William F., Philip L. Bloch, Brian R. Hudgens, Leonie C. Moyle, and John R.  
527 Stinchcombe. 2002. “Population viability analysis in endangered species recovery plans: past  
528 use and future improvements.” *Ecological Applications* 12(3): 708–12.
- 529 Moussus, J. P., F. Jiguet, J. Clavel, and R. Julliard. 2009. “A method to estimate phenological  
530 variation using data from large $\square$  scale abundance monitoring programmes.” *Bird Study: The*  
531 *Journal of the British Trust for Ornithology* 56(2): 198-212.

- 532 Newson, Stuart E., Nick J. Moran, Andy J. Musgrove, James W. Pearce-Higgins, Simon  
533 Gillings, Philip W. Atkinson, Ryan Miller, Mark J. Grantham, and Stephen R. Baillie. 2016.  
534 “Long-term changes in the migration phenology of UK breeding birds detected by large-scale  
535 citizen science recording schemes.” *The Ibis* 158(3): 481–95.
- 536 Oke, Krista B., Curry J. Cunningham, Thomas P. Quinn, and Andrew P. Hendry. 2019.  
537 “Independent lineages in a common environment: the roles of determinism and contingency  
538 in shaping the migration timing of even-versus odd-year pink salmon over broad spatial and  
539 temporal scales.” *Ecology Letters* 22(10): 1547–1556.
- 540 Park, Daniel S., Ian Breckheimer, Alex C. Williams, Edith Law, Aaron M. Ellison, and Charles  
541 C. Davis. 2019. “Herbarium specimens reveal substantial and unexpected variation in  
542 phenological sensitivity across the Eastern United States.” *Philosophical Transactions of the  
543 Royal Society of London* 374(1763): 20170394.
- 544 Parmesan, Camille. 2007. “Influences of species, latitudes and methodologies on estimates of  
545 phenological response to global warming.” *Global Change Biology* 13(9): 1860–72.
- 546 Parmesan, Camille, and Gary Yohe. 2003. “A globally coherent fingerprint of climate change  
547 impacts across natural systems.” *Nature* 421(6918): 37.
- 548 Pearse, William D., Charles C. Davis, David W. Inouye, Richard B. Primack, and T. Jonathan  
549 Davies. 2017. “A statistical estimator for determining the limits of contemporary and historic  
550 phenology.” *Nature Ecology & Evolution* 1(12):1876-1882.
- 551 Pievani, Telmo. 2014. “The sixth mass extinction: Anthropocene and the human impact on  
552 biodiversity.” *Rendiconti Lincei*. 25(1): 85–93
- 553 Pollard, E. 1977. “A method for assessing changes in the abundance of butterflies.” *Biological  
554 Conservation* 12(2):115–134.

- 555 Pollard E, D.O. Elias, M.J Skelton, and J.A. Thomas. 1975. “A method of assessing the  
556 abundance of butterflies in Monks wood national nature reserve in 1973.” *Entomologist’s*  
557 *Gazette* 26:79–88
- 558 Pollard, E., and T. J. Yates. 1993. *Monitoring Butterflies for Ecology and Conservation*.  
559 Chapman & Hall, London.
- 560 Potts, Simon G., Jacobus C. Biesmeijer, Claire Kremen, Peter Neumann, Oliver Schweiger, and  
561 William E. Kunin. 2010. “Global pollinator declines: trends, impacts and drivers.” *Trends in*  
562 *Ecology & Evolution* 25(6): 345–53
- 563 Proia, Frédéric, Alix Pernet, Tatiana Thouroude, Gilles Michel, and Jérémy Clotault. 2016. “On  
564 the characterization of flowering curves using Gaussian mixture models.” *Journal of*  
565 *Theoretical Biology* 402: 75–88.
- 566 R Core Team. 2020. “R: A language and environment for statistical computing”. R Foundation  
567 for Statistical Computing, Vienna, Austria. <https://www.R-project.org/>.
- 568 Rothery, Peter, and David B. Roy. 2001. “Application of generalized additive models to butterfly  
569 transect count data.” *Journal of Applied Statistics* 28(7): 897–909.
- 570 Roy, D. B., P. Rothery, D. Moss, E. Pollard, and J. A. Thomas. 2001. “Butterfly numbers and  
571 weather: predicting historical trends in abundance and the future effects of climate change:  
572 climate change and butterfly numbers.” *The Journal of Animal Ecology* 70(2): 201–17.
- 573 Roy, D. B., and T. H. Sparks. 2000. “Phenology of British butterflies and climate change.”  
574 *Global Change Biology* 6(4):407–416.
- 575 Schultz, Cheryl B., and Paul C. Hammond. 2003. “Using population viability analysis to develop  
576 recovery criteria for endangered insects: case study of the Fender’s blue butterfly.”  
577 *Conservation Biology* 17(5): 1372–85

- 578 Seaman III, John W., John W. Seaman Jr., and James D. Stamey. 2012. “Hidden dangers of  
579 specifying noninformative priors.” *The American Statistician* 66(2): 77–84.
- 580 Sparks, T. H., and T. J. Yates. 1997. “The effect of spring temperature on the appearance dates  
581 of British butterflies 1883–1993.” *Ecography* 20(4): 368–74
- 582 Stefanescu, Constanti, Josep Penuelas, and Iolanda Filella. 2003. “Effects of climatic change on  
583 the phenology of butterflies in the northwest Mediterranean basin.” *Global Change Biology*  
584 9(10): 1494–1506.
- 585 Stemkovski, Michael, William D. Pearse, Sean R. Griffin, Gabriella L. Pardee, Jason Gibbs,  
586 Terry Griswold, John L. Neff, et al. 2020. “Bee phenology is predicted by climatic variation  
587 and functional traits.” *Ecology Letters* 23:1589--1598
- 588 Stewart, James E., Javier Gutiérrez Illán, Shane A. Richards, David Gutiérrez, and Robert J.  
589 Wilson. 2020. “Linking inter-annual variation in environment, phenology, and abundance  
590 for a montane butterfly community.” *Ecology* 101(1): e02906.
- 591 Taylor, Shawn D. 2019. “Estimating flowering transition dates from status-based phenological  
592 observations: a test of methods.” *PeerJ* 7: e7720.
- 593 Thomas, J. A. 1983. “A quick method for estimating butterfly numbers during surveys.”  
594 *Biological Conservation* 27(3): 195–211.
- 595 Thomas, J. A. 2005. “Monitoring change in the abundance and distribution of insects using  
596 butterflies and other indicator groups.” *Philosophical Transactions of the Royal Society B:  
597 Biological Sciences* 360(1454): 339–57.
- 598 Thomas, Chris D., T. Hefin Jones, and Sue E. Hartley. 2019. “‘Insectageddon’: a call for more  
599 robust data and rigorous analyses.” *Global Change Biology* 25(6): 1891–92.
- 600 Turvey, Samuel T., and Jennifer J. Crees. 2019. “Extinction in the Anthropocene.” *Current*

- 601 *Biology* 29(19): R982–86.
- 602 Van Buskirk, Josh, Robert S. Mulvihill, and Robert C. Leberman. 2009. “Variable shifts in  
603 spring and autumn migration phenology in North American songbirds associated with  
604 climate change.” *Global Change Biology* 15(3): 760–71.
- 605 Van Klink, Roel, Diana E. Bowler, Konstantin B. Gongalsky, Ann B. Swengel, Alessandro  
606 Gentile, and Jonathan M. Chase. 2020. “Meta-analysis reveals declines in terrestrial but  
607 increases in freshwater insect abundances.” *Science* 368(6489): 417–20.
- 608 Van Strien, Arco J. van, Willem F. Plantenga, Leo L. Soldaat, Chris A. M. van Swaay, and  
609 Michiel F. WallisDeVries. 2008. “Bias in phenology assessments based on first appearance  
610 data of butterflies.” *Oecologia* 156(1): 227–235.
- 611 Wagner, David L., Eliza M. Grames, Matthew L. Forister, May R. Berenbaum, and David  
612 Stopak. 2021. “Insect decline in the Anthropocene: death by a thousand cuts.” *Proceedings of*  
613 *the National Academy of Sciences* 118(2).
- 614 Weis, Arthur E., Susana M. Wadgymar, Michael Sekor, and Steven J. Franks. 2014. “The shape  
615 of selection: using alternative fitness functions to test predictions for selection on flowering  
616 time.” *Evolutionary Ecology* 28(5): 885–904.
- 617 Wepprich, Tyson, Jeffrey R. Adrion, Leslie Ries, Jerome Wiedmann, and Nick M. Haddad.  
618 2019. “Butterfly abundance declines over 20 years of systematic monitoring in Ohio, USA.”  
619 *PloS One* 14(7): e0216270
- 620 Williams, Byron K., James D. Nichols, and Michael J. Conroy. 2002. *Analysis and management*  
621 *of animal populations*. Academic Press.
- 622 Wood, Simon N. 2017. *Generalized additive models: an introduction with R*. CRC press.
- 623 Yule, Kelsey M., and Judith L. Bronstein. 2018. “Reproductive ecology of a parasitic plant

624 differs by host species: vector interactions and the maintenance of host races.” *Oecologia*

625 186(2): 471–82.

626 Zonneveld, Cor. 1991. “Estimating death rates from transect counts.” *Ecological Entomology*

627 16(1): 115–121.

628

629 **Figure 1:** Gaussian model fitted to Baltimore checkerspot butterfly data. Points show raw data,  
630 blue lines show best-fitting Gaussian curve, dashed gray lines show +/- 1 standard error. For  
631 comparability, day of month for axis labels in this and other figures is based on a 365 day year  
632 (excludes leap days). Note the different scales on the y-axes.

633 **Figure 2:** Fitted population metrics: (A-C) abundance index (A), mean day of activity (B), flight  
634 period (C) across years (sequentially). Bars show +/- 1 standard error, calculated using the delta  
635 method (black) or parametric bootstrapping (blue). (D-F) Comparison of same population  
636 metrics with the Growing Degree Days (GDD) on July 10 for each year. Solid and dashed black  
637 lines show best-fitting model for significant (solid) and non-significant (dashed) linear  
638 regression. In all panels, parametric bootstrap standard errors are based on 0.16 and 0.84  
639 quantiles of bootstrap samples (quantiles corresponding to +/- 1 standard error).

640 **Figure 3:** Comparing derived estimates from GLM approach to other commonly used  
641 approaches (A) Comparison of GLM estimated abundance index to mark-recapture estimates.  
642 Black lines show +/- 1 standard error of each metric, dashed line shows best-fitting curve ( $R^2 =$   
643 0.94). (B) Comparing CLM estimated abundance index with INCA estimated abundance index  
644 (INCA is an implementation of the Zonneveld model) ( $R^2 = 0.99$ ). (C-D) Comparison of  
645 quantile-based estimates of onset (C) and end (D) of activity to day of first (C) and last (D)  
646 observation for each year, with point size scaled by GLM estimated population index (square-  
647 root scale). Black lines show a 1:1 line going through the mean of observed values. As expected,  
648 years with smaller population sizes show less extreme observations (i.e., points above (C) and  
649 below (D) the 1:1 line).

650 **Table 1:** Summary of ad-hoc literature review on statistical methods for fitting activity curves to  
651 repeated count data, looking to see how often the proposed methods have actually been used.

652 Note that there were a few non-English publications citing these methods papers which we were  
653 unable to evaluate. In addition to these methods, Generalized Additive Models (GAMs) have  
654 been widely used in a variety of phenological studies and one older method (Zonneveld et al.  
655 1991) is widely used by some insect ecologists (see discussion in main text). We also did not  
656 include custom-coded (typically Bayesian) approaches that would need substantial recoding of  
657 the method to be applied to a new data set.

658 **Table S1:** Comparing ability of GLM and INCA models to fit the Baltimore checkerspot data.  
659 “Non-zero counts” represents the number of survey days in that year with at least one butterfly  
660 observed; “Gaussian fits?” shows whether or not our GLM approach fit the data”; “INCA fits?”  
661 shows whether or not the Zonneveld method implemented in the INCA program fit the data  
662 (using default settings); “INCA+ fits?” shows the same results, but when INCA is given  
663 mortality information independently determined from Brown and Crone 2016. We see that INCA  
664 struggles to fit much of our data, INCA+ fits most of our data, and the GLM approach fits all of  
665 our data.

666

667



668 **Figure 1.**

669

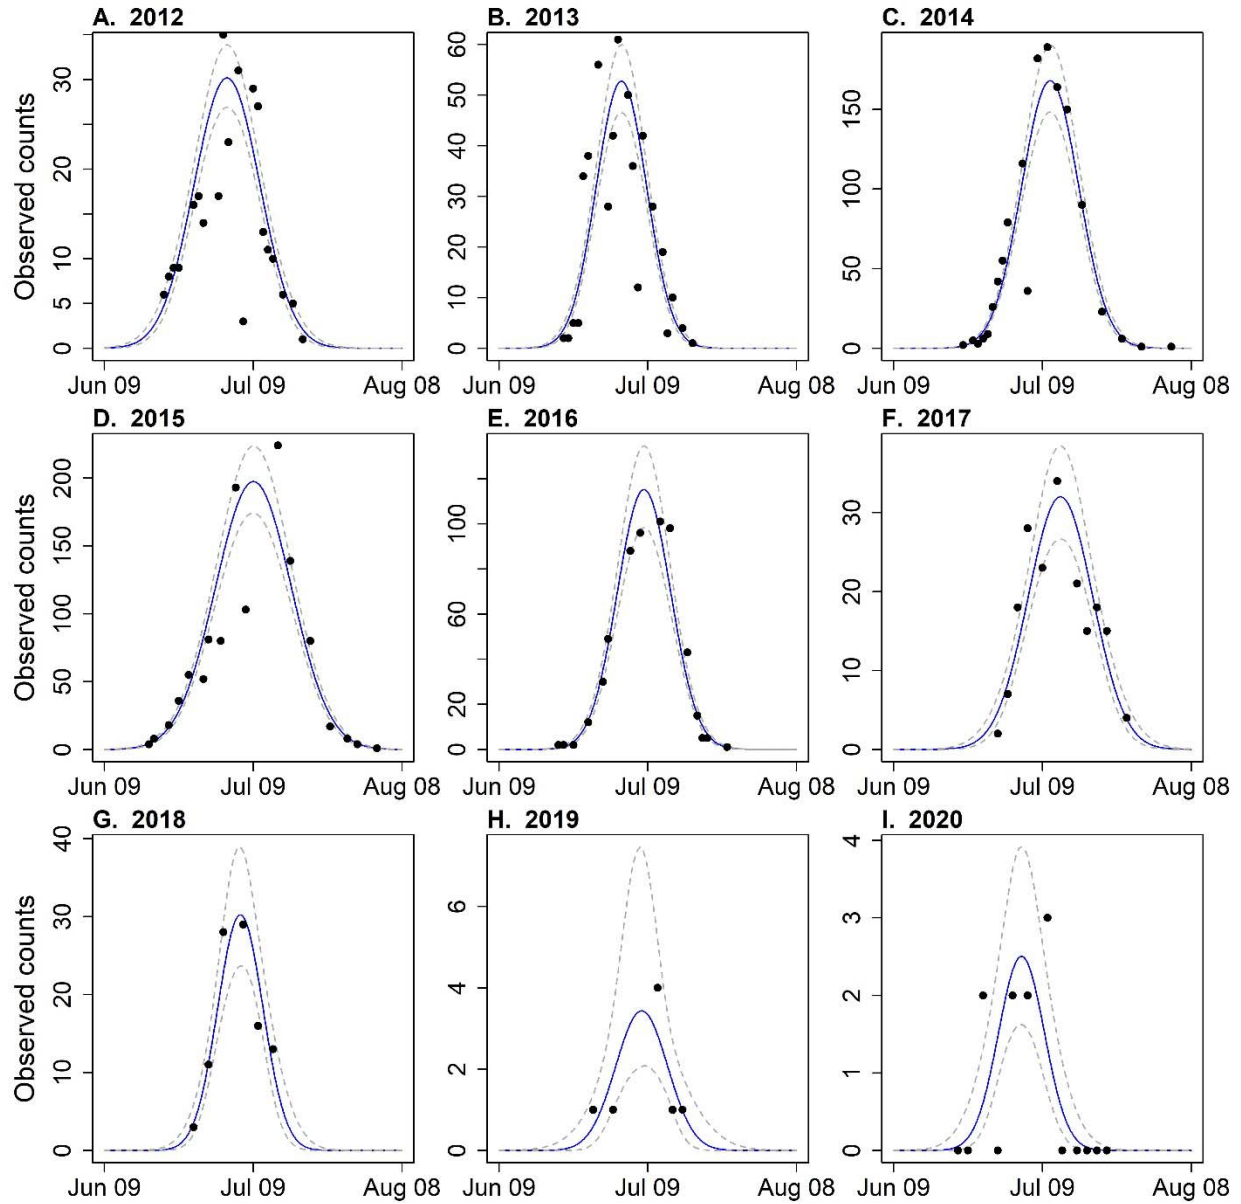

670

671 **Figure 2**

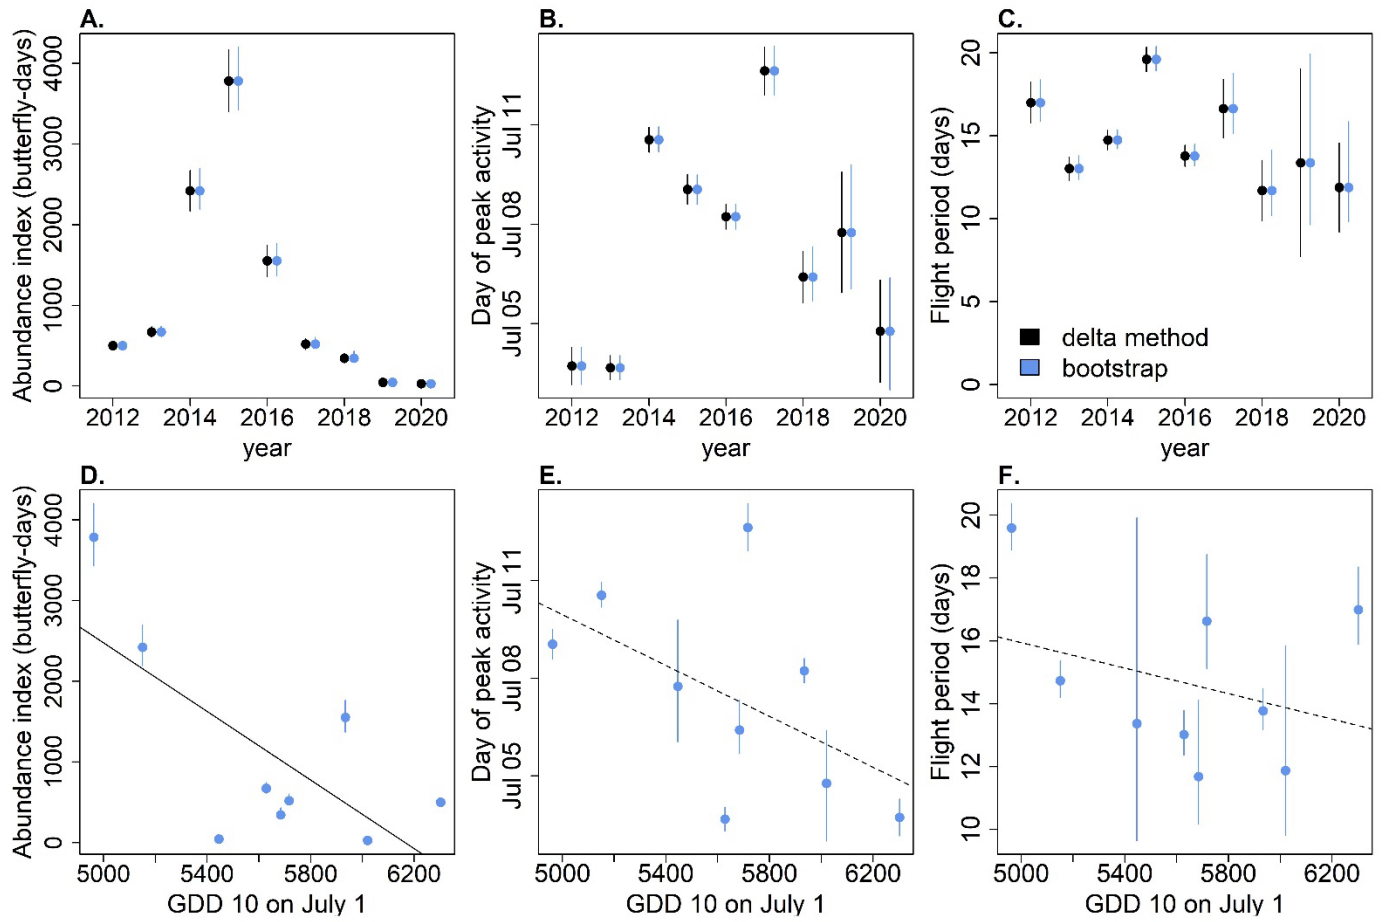

672

673

674

675 **Figure 3**

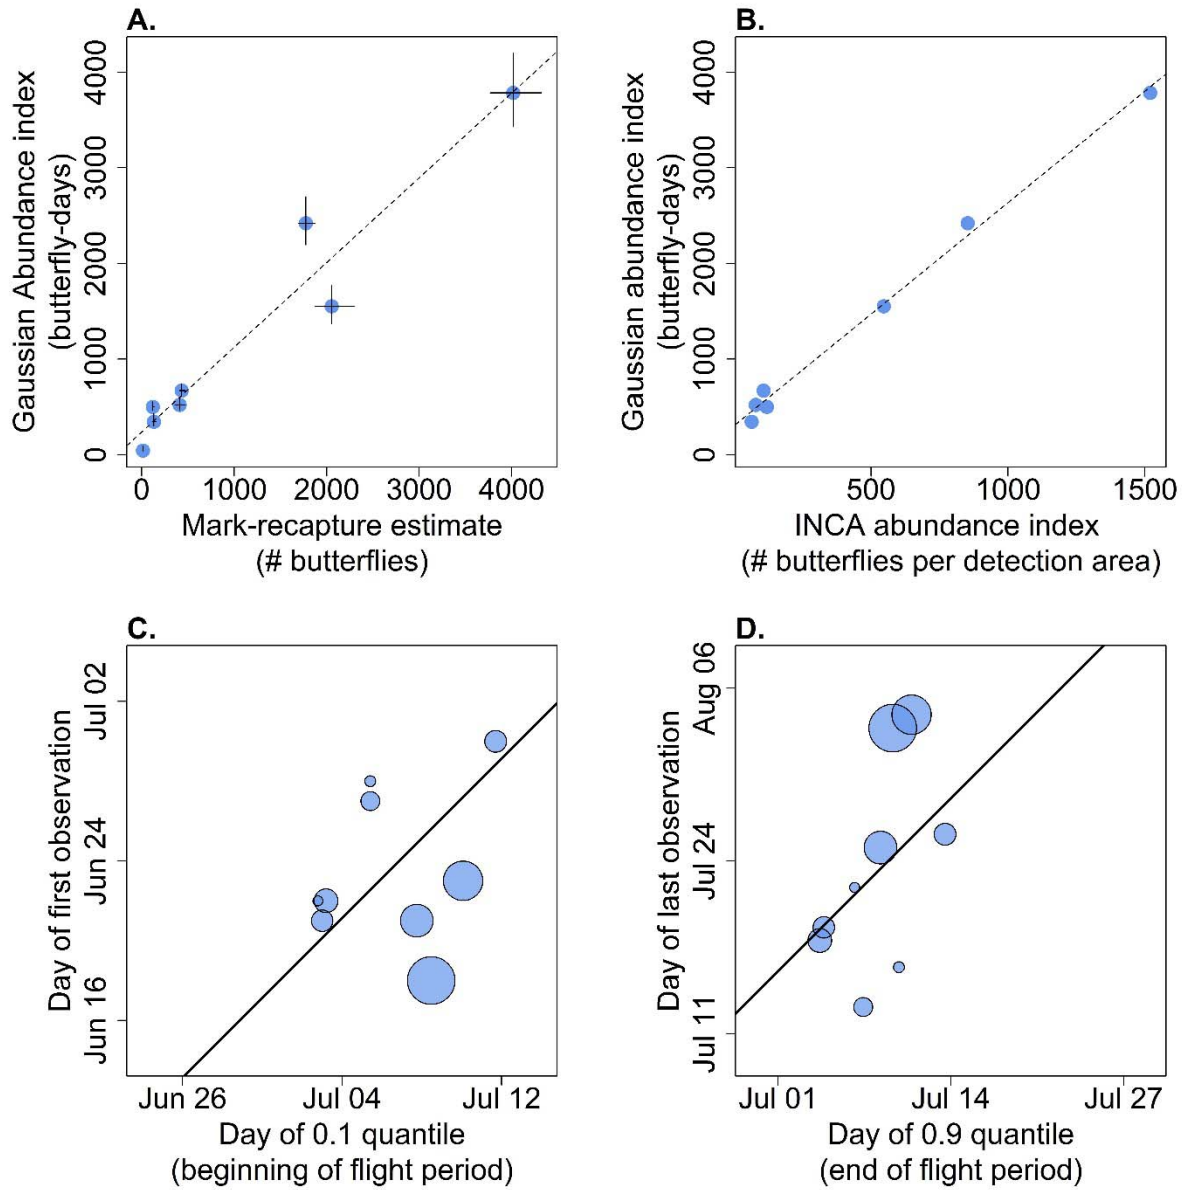

676

677

678 **Table 1**

| <b>Method</b>                            | <b>Publication</b>      | <b>System</b>             | <b>Description</b>                                                                                                                                                                                                                                                 | <b>Used in</b>                                                                                                                                                                     |
|------------------------------------------|-------------------------|---------------------------|--------------------------------------------------------------------------------------------------------------------------------------------------------------------------------------------------------------------------------------------------------------------|------------------------------------------------------------------------------------------------------------------------------------------------------------------------------------|
| <b>Generalized epsilon-skew-Gaussian</b> | Clark and Thompson 2011 | plants                    | 5-parameter function - imagine a Gaussian flexible enough to have skew.                                                                                                                                                                                            | Yule and Bronstein 2018 (plants), Weis et al. 2014 (plants).                                                                                                                       |
| <b>Gaussian mixture models</b>           | Proia et al. 2015       | plants                    | Gaussian mixture models                                                                                                                                                                                                                                            | 0                                                                                                                                                                                  |
| <b>Principle coordinate analysis</b>     | Austen et al. 2014      | plants                    | Take matrix of open flowers on date (col) per plant (row). Calculate difference between entries as a new coordinate system. Now summarize that with a PCoA, kind of like we would with a PCA. From this, calculate Chord distance and Komogorov-Smirnov distances. | 0                                                                                                                                                                                  |
| <b>Weibull</b>                           | Pearse et al. 2017      | plants (presence/absence) | Note: implemented in the phest package                                                                                                                                                                                                                             | Taylor 2019 (methods-testing paper), Belitz et al. 2020 (although not really - builds on weibull distribution, but distinct method) (plants, monarch butterflies)                  |
| <b>survival modeling</b>                 | Elmendorf et al. 2019   | plants (presence/absence) | hierarchical survival models. Seems good for presence/absence of phenological state                                                                                                                                                                                | 0                                                                                                                                                                                  |
| <b>Weibull-based percentile metric</b>   | Belitz et al. 2020      | flowers, monarchs         | Using weibull distribution for any quantile. R package phenesse.                                                                                                                                                                                                   | 0, but not a fair comparison – very recently published.                                                                                                                            |
| <b>Exponential Sine</b>                  | Malo 2002               | Flowers                   | Exponential Sine.                                                                                                                                                                                                                                                  | Forrest and Thomson 2011 (only used to estimate flower data on missing dates for two plant species); Herreras-Diego 2006 (using a simplified version that is symmetrical) (plants) |

679

680

681

682 **Table S1**

| Year | Non-zero counts | INCA fit? | INCA+ fit? | Gaussian fit? |
|------|-----------------|-----------|------------|---------------|
| 2012 | 23              | <u>No</u> | Yes        | Yes           |
| 2013 | 20              | Yes       | Yes        | Yes           |
| 2014 | 20              | <u>No</u> | Yes        | Yes           |
| 2015 | 18              | <u>No</u> | Yes        | Yes           |
| 2016 | 15              | <u>No</u> | Yes        | Yes           |
| 2017 | 11              | Yes       | Yes        | Yes           |
| 2018 | 6               | Yes       | Yes        | Yes           |
| 2019 | 5               | <u>No</u> | <u>No</u>  | Yes           |
| 2020 | 4               | <u>No</u> | <u>No</u>  | Yes           |

683

684

685
